# Supplementary material for: Analysis of the cloud fraction adjustment to aerosols and its dependence on meteorological controls using explainable machine learning
Source: Copernicus journal article supplement (doi:10.5194/acp-24-13025-2024), 2024-11-26
Supplement: Supplementary file 1 [file acp-24-13025-2024-supplement.pdf]

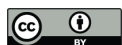

*Supplement of*

## **Analysis of the cloud fraction adjustment to aerosols and its dependence on meteorological controls using explainable machine learning**

**Yichen Jia et al.**

*Correspondence to:* Yichen Jia (yichen.jia@kit.edu)

The copyright of individual parts of the supplement might differ from the article licence.

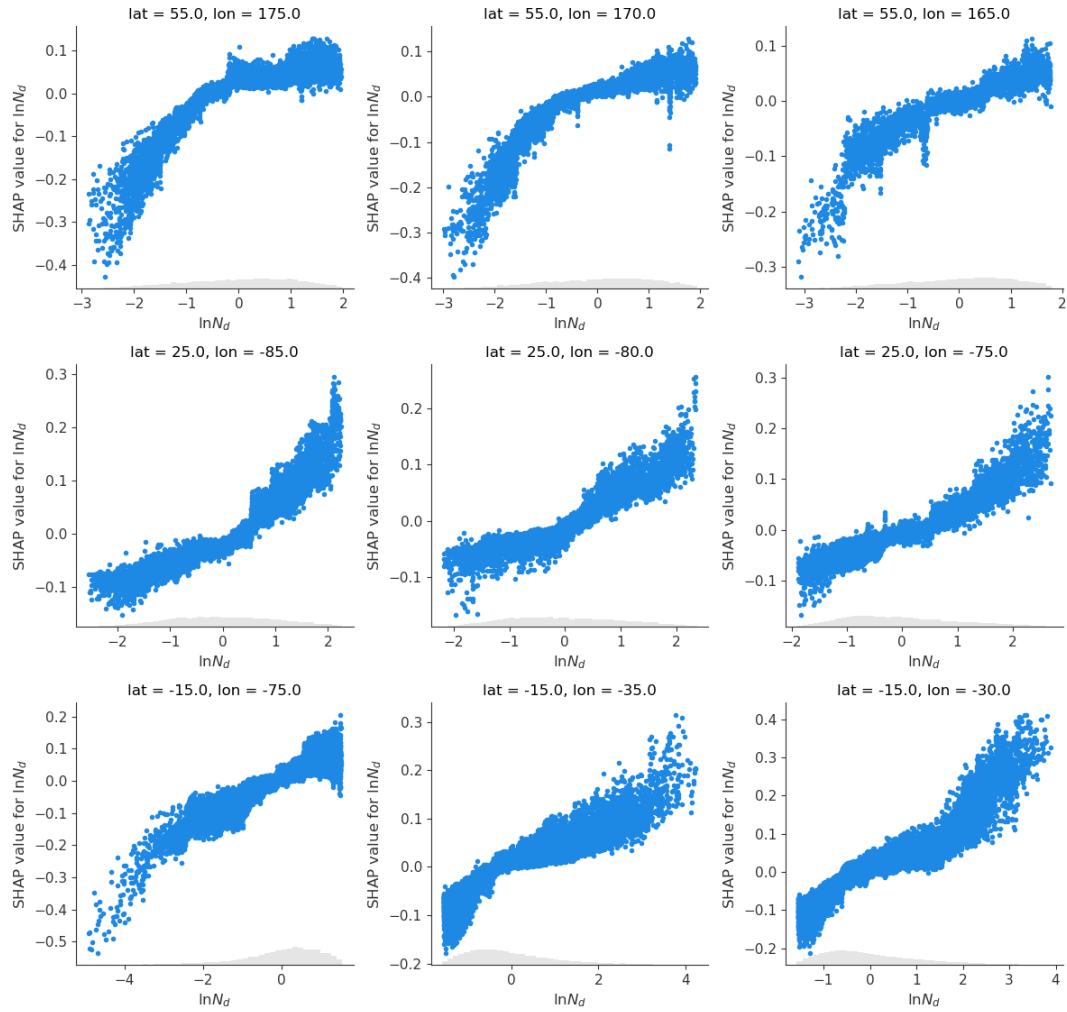

**Figure S1.** SHAP dependence plots similar to Fig. 1 (b) illustrating relatively nonlinear relationships between  $\ln N_d$  SHAP values and feature values (standardized). The latitude and longitude values for each subplot represent the midpoint of each  $5^\circ \times 5^\circ$  geographical window.

Figures S2 to S7 illustrate results from the same but non-standardized data sets. Box plots Fig. 3 and Fig. 7 do not have corresponding non-standardized plots here because the magnitudes of the sensitivities and interaction indices are not physically comparable without the standardization process.

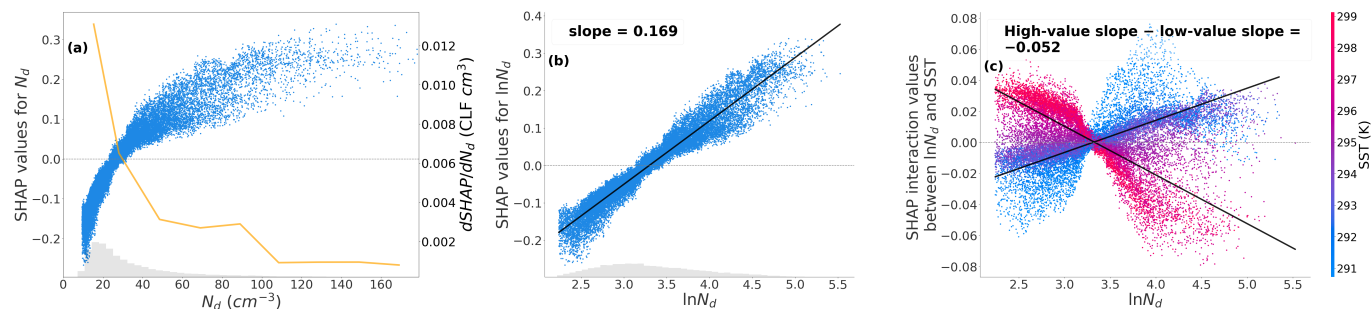

**Figure S2.** SHAP dependence plots for cloud droplet number concentration ( $N_d$ ) in the region from  $27.5^\circ\text{S}$  to  $32.5^\circ\text{S}$  and from  $122.5^\circ\text{W}$  to  $127.5^\circ\text{W}$ . **Similar to Fig. 1, (a) is the same while the log-transformed cloud droplet number concentration ( $\ln N_d$ ) and sea surface temperature (SST) are not standardized in (b) and (c).**

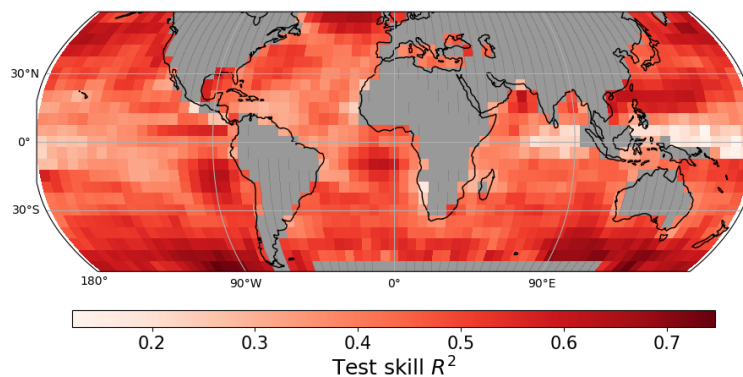

**Figure S3.**  $R^2$  score of regional Extreme Gradient Boosting models predicting cloud fraction of marine boundary layer clouds in the independent test data set (2017–2019). **Similar to Fig. 2 but predictor variables are not standardized.**

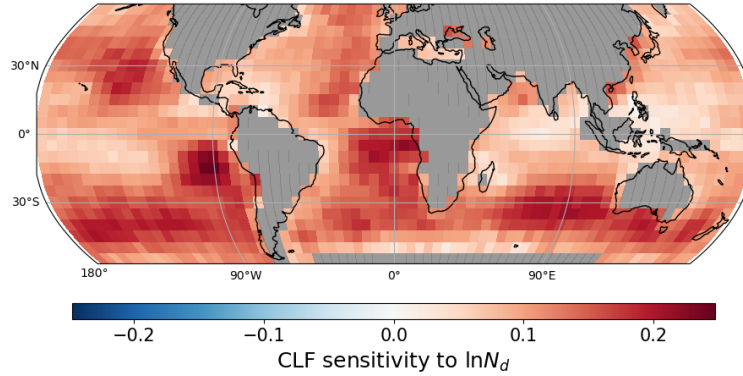

**Figure S4.** Sensitivity of marine boundary layer cloud fraction to  $\ln N_d$ . Similar to Fig. 4 but predictor variables are not standardized.

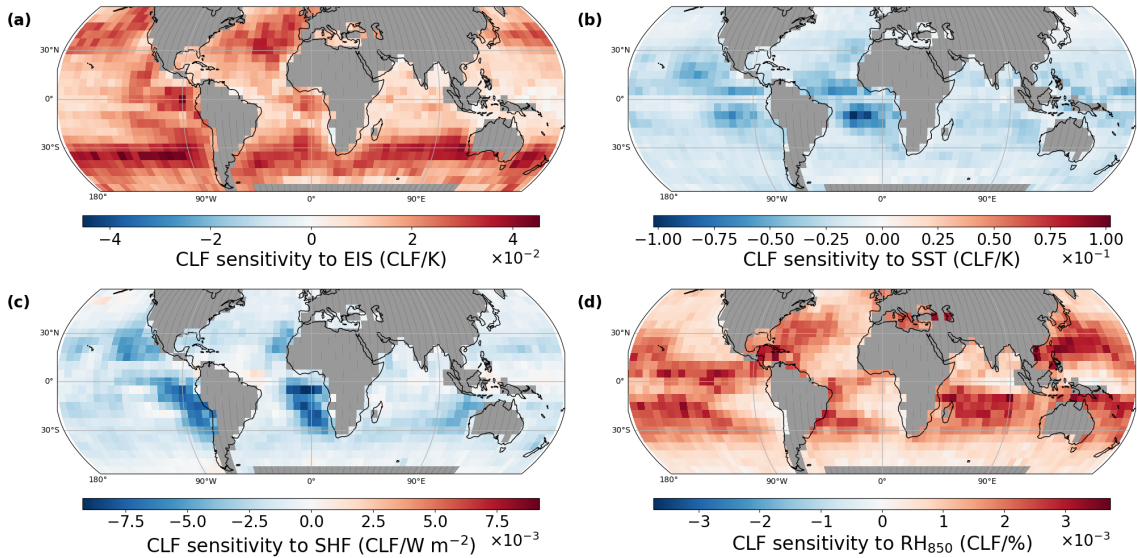

**Figure S5.** Sensitivity of marine boundary layer cloud fraction to the estimated inversion strength (EIS), sea surface temperature (SST), sensible heat flux (SHF) and relative humidity at 850 hPa ( $RH_{850}$ ). Similar to Fig. 5 but predictor variables are not standardized, and thus the units and ranges of colourbars vary.

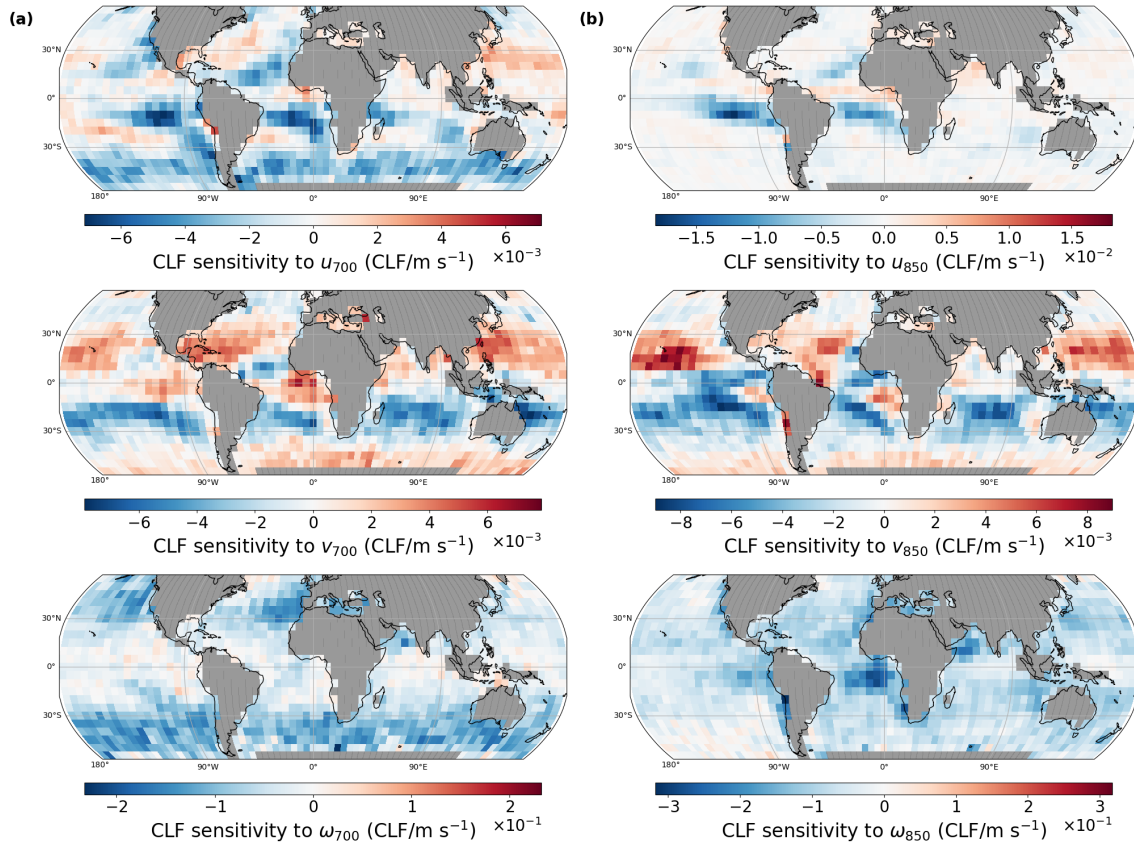

**Figure S6.** Sensitivity of cloud fraction to u, v wind component vectors and vertical velocities at 700 hPa (column (a)) and 850 hPa (column (b)). Similar to Fig. 6 but predictor variables are not standardized, and thus the units and ranges of colourbars vary.

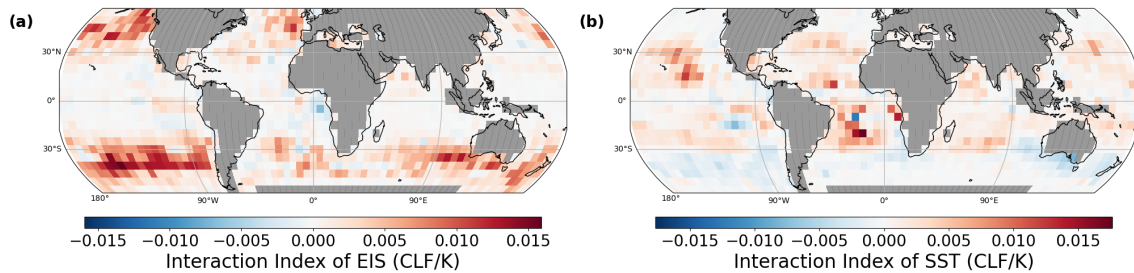

**Figure S7.** Patterns of the Interaction Index showing the dependence of the  $\ln N_d$ -CLF relationship on estimated inversion strength (EIS) (a) and sea surface temperature (SST) (b). Similar to Fig. 8 but predictor variables are not standardized.
